# Supplementary material for: Genome Mining and Comparative Genome Analysis Revealed Niche-Specific Genome Expansion in Antibacterial Bacillus pumilus Strain SF-4
Source: MDPI journal article supplement (doi:10.3390/genes12071060), 2021-07-12
Supplement: s1 [file s1]

# Genome mining and comparative genome analysis revealed niche-specific genome expansion in antibacterial *Bacillus pumilus* strain SF-4

Sajid Iqbal <sup>a</sup>, John Vollmers <sup>b</sup>, Hussnain Ahmed Janjua <sup>a\*</sup>

<sup>a</sup>Department of Industrial Biotechnology, Atta-ur-Rahman School of Applied Biosciences (ASAB), National University of Sciences and Technology (NUST), H-12 Islamabad, Pakistan.

<sup>b</sup>Institute for Biological Interfaces 5 (IBG-5), Institute of Technology (KIT), 76344 Eggenstein-Leopoldshafen, Germany.

\* Correspondence: Hussnain Ahmed Janjua; hussnain.janjua@asab.nust.edu.pk

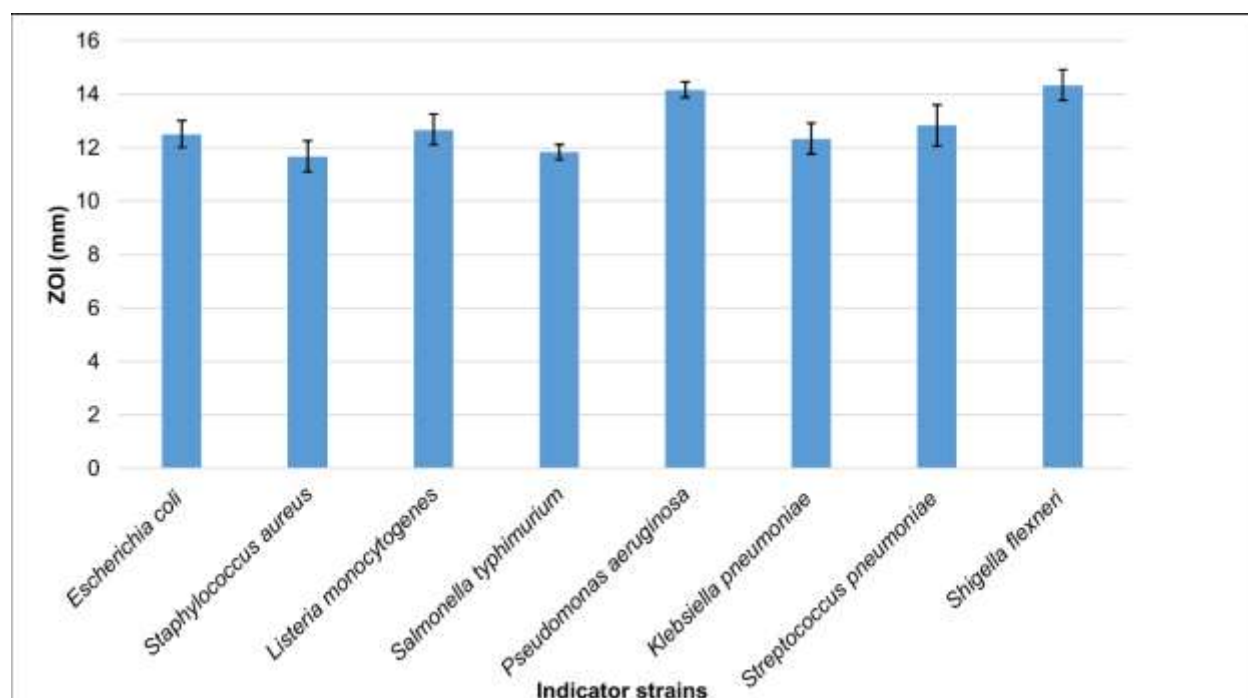

**Figure S1.** Antibacterial activities of *Bacillus pumilus* strain SF-4 against indicator ATCC strains. Errors bars indicate the standard deviation of triplicate experiments.
